# Supplementary material for: Molecular tracking devices quantify antigen distribution and archiving in the lymph node
Source: bioRxiv preprint, doi:10.1101/2020.08.19.219527, version 1 (2020-08-19)
Supplement: Supplemental Table 2 [file 219527_file03.xlsx]

## Sheet: Myeloid_Day_2
Sample

## Sheet: Myeloid_Day_14
Sample

## Sheet: Endothelial_Stromal_Day_2
Sample

## Sheet: Endothelial_Stromal_Day_14
Sample

## Sheet: Fibroblast_Stromal_Day_2
Sample

## Sheet: Fibroblast_Stromal_Day_14
Sample
